# Supplementary material for: Differences in Care Team Response to Patient Portal Messages by Patient Race and Ethnicity
Source: PubMed Central journal article supplement (PMC10949096; doi:10.1001/jamanetworkopen.2024.2618), 2024-03-18
Supplement: jamanetwopen-e242618-s001.pdf [file jamanetwopen-e242618-s001.pdf]

## Supplementary Online Content

Tang M, Mishuris RG, Payvandi L, Stern AD. Differences in care team response to patient portal messages by patient race and ethnicity. *JAMA Netw Open*. 2024;7(3):e242618. doi:10.1001/jamanetworkopen.2024.2618

**eTable 1.** 27 Common Conditions Used to Represent Patient Health Status

**eMethods.** Specific Methods

**eTable 2.** Characteristics of Patients Who Were Primary Care Active at Boston Medical Center in 2020 and Sent at Least One Patient Medical Advice Message

**eTable 3.** Additional 2021 Patient Medical Advice Request Care Team Response Outcomes for Patients Who Were Primary Care Active at Boston Medical Center in 2020

**eTable 4.** Characteristics of 2021 Patient Medical Advice Request Threads From Patients Who Were Primary Care Active at Boston Medical Center in 2020

**eFigure 1.** Subgroup Sensitivity Analysis – 2021 Attending Response Rates for Patient Medical Advice Request Threads by Patients Who Were Primary Care Active at Boston Medical Center in 2020

**eFigure 2.** Alternative Sample Sensitivity Analysis – 2021 Care Team Response Rates for Patient Medical Advice Request Threads by Patients Who Were Primary Care Active at Boston Medical Center in 2019

**eFigure 3.** Random Effects Model Sensitivity Analysis – 2021 Care Team Response Rates for Patient Medical Advice Request Threads by Patients Who Were Primary Care Active at Boston Medical Center in 2020

**eFigure 4.** 2021 First Care Team Response to Patient Medical Advice Request Threads by Patients Who Were Primary Care Active at Boston Medical Center in 2020

**eTable 5.** Additional 2021 Care Team Response Outcomes to Patient Medical Advice Request Threads by Patients Who Were Primary Care Active at Boston Medical Center in 2020 – Comparison by Patient Race and Ethnicity, Controlling for Patient Characteristics, Message Characteristics, and Recipient Department

**eTable 6.** Share of 2021 Patient Medical Advice Request Threads From Patients Who Were Primary Care Active at Boston Medical Center in 2020

This supplementary material has been provided by the authors to give readers additional information about their work.

**eTable 1. 27 common conditions used to represent patient health status**

| <b>Condition</b>                      |
|---------------------------------------|
| Hypertension                          |
| Hyperlipidemia                        |
| Depression                            |
| Anemia                                |
| Cataracts                             |
| Diabetes                              |
| Rheumatoid Arthritis/Osteoarthritis   |
| Chronic Kidney Disease                |
| Asthma                                |
| Glaucoma                              |
| Ischemic Heart Disease                |
| Chronic Obstructive Pulmonary Disease |
| Acquired Hypothyroidism               |
| Benign Prostatic Hyperplasia          |
| Heart Failure                         |
| Stroke/Transient Ischemic Attack      |
| Osteoporosis                          |
| Atrial Fibrillation                   |
| Acute Myocardial Infarction           |
| Non-Alzheimer's Dementia              |
| Breast Cancer                         |
| Prostate Cancer                       |
| Colorectal Cancer                     |
| Lung Cancer                           |
| Alzheimer's Disease                   |
| Hip/Pelvic Fracture                   |
| Endometrial Cancer                    |

## eMethods. Specific Methods

### Ordinary Least Squares Regression Specifications

$$Y_{i,m,x,p,z,d} = \sum_r \beta_r R_{ir} + \beta X_i + \alpha M_m + \gamma_p + \zeta_z + \delta_d + \rho_x + \epsilon_{ispzd}$$

Where  $i$  refers to a patient.  $m$  refers to a specific message thread sent to recipient department  $x$ .  $p$  refers to the patient's health insurer,  $z$  refers to their zip code of residence, and  $d$  refers to their most seen primary care provider in 2020.

$Y_{i,m,x,p,z,d}$  represents the type of response message thread ( $i, m, x$ ) ultimately received. We examined whether the message had any care team response. We also examined the types of care team members that responded. Provider categories included: (1) attending physician, (2) registered nurse (RN), (3) advanced practice provider (APP), (4) resident physician, and (5) other (including medical assistants, social workers, etc.). Additional secondary response outcomes included (1) the number of care team responses; (2) hours until first care team response; and (3) whether the thread ended on a patient message or not. We also included a set of outcomes capturing the provider type that gave the thread's first care team response, leveraging the same provider categories noted previously.

$R_{ir}$  refers to whether patient  $i$  is in race and ethnicity group  $r$ . The  $\beta_r$  values serve as our main estimates of interest, reflecting the adjusted difference in response outcomes for messages sent by patients in race and ethnicity  $r$ , relative to White patients, which serve as our reference group.

$X_i$  refers to the patient's characteristics:

- Sex
- Age group: either 18-24, 25-34, 35-44, 45-54, 55-64, 65+
- Number of chronic conditions: 0, 1, 2, 3, 4, 5, 6, 7, 8+
- Whether English was their primary language

$M_m$  refers to a message's characteristics. In our main specification we limit these to the following:

- Year-month that the message was sent
- The day of the week the message was sent
- The hour of the day the message was sent

$\gamma_p + \zeta_z + \delta_d + \rho_x$  are fixed effects for the patient's health insurer, zip code of residence, most seen primary care provider in 2020, and the recipient department the message was sent to respectively.

Standard errors were clustered at the patient level.

In robustness checks we incorporated the following groups of additional controls (results provided in **Figure 2**):

### 1. Additional message characteristics

- Whether the initial message included an attachment
- Whether the initial message was sent via the mobile app
- Whether the initial message was sent via the iPhone or Android mobile app
- Whether the following portal functionalities were used in the same portal session that generated the initial message: “Medical Histories”, “Test Results List”, “Test Results Details”, “Medications”, “Clinical Notes”, “Upcoming Appointments”, “Visits”, “Inpatient Admissions”, “Provider List Widget”

### 2. Outpatient utilization

- Whether the patient had any outpatient visits in the 14 days prior to the message, the 7 days prior to the message, the day of the message, 7 days following the message, and 14 days following the message
- The number of PCP outpatient visits the patient had in 2020 (including both a linear and squared term)
- The number of non-PCP outpatient visits the patient had in 2020 (including both a linear and squared term)

### 3. ED and inpatient utilization

- Whether the patient had any emergency department or inpatient discharges in the 28, 21, 14, and 7 days prior to the message; the day of the message; and the 28, 21, 14, and 7 days after the message

### 4. Prior messaging experience

- The number of patient medical advice request threads sent in 2020 to the specific recipient department on this message (including both a linear and squared term)
- The number of patient medical advice request threads sent in 2020 to any department other than the recipient department (including both a linear and squared term)

### 5. Prior department visit experience

- The number of outpatient visits the patient had with the recipient department in 2020 (including both a linear and squared term)

**eTable 2. Characteristics of Patients Who Were Primary Care Active at Boston Medical Center in 2020 and Sent at Least One Patient Medical Advice Message**

|                                                                                     | Patient race and ethnicity group |               |               |               |               |
|-------------------------------------------------------------------------------------|----------------------------------|---------------|---------------|---------------|---------------|
|                                                                                     | Asian                            | Black         | Hispanic      | White         | Total         |
| Total PCP active patients, No. (% of total)                                         | 686 (6.4%)                       | 4,793 (44.9%) | 1,797 (16.8%) | 3,410 (31.9%) | 10,686 (100%) |
| Sex, No. (%)                                                                        |                                  |               |               |               |               |
| Female                                                                              | 415 (60.5%)                      | 3,447 (71.9%) | 1,276 (71.0%) | 2,070 (60.7%) | 7,208 (67.5%) |
| Male                                                                                | 271 (39.5%)                      | 1,346 (28.1%) | 521 (29.0%)   | 1,340 (39.3%) | 3,478 (32.5%) |
| Age, Mean                                                                           | 42.9 (42.9)                      | 44.3 (44.3)   | 43.1 (43.1)   | 46.9 (46.9)   | 44.9 (44.9)   |
| Age category, No. (%)                                                               |                                  |               |               |               |               |
| 18 to 24                                                                            | 32 (4.7%)                        | 211 (4.4%)    | 94 (5.2%)     | 93 (2.7%)     | 430 (4.0%)    |
| 25 to 34                                                                            | 264 (38.5%)                      | 1,400 (29.2%) | 555 (30.9%)   | 994 (29.1%)   | 3,213 (30.1%) |
| 35 to 44                                                                            | 134 (19.5%)                      | 1,066 (22.2%) | 450 (25.0%)   | 651 (19.1%)   | 2,301 (21.5%) |
| 45 to 54                                                                            | 86 (12.5%)                       | 855 (17.8%)   | 284 (15.8%)   | 445 (13.0%)   | 1,670 (15.6%) |
| 55 to 64                                                                            | 79 (11.5%)                       | 672 (14.0%)   | 224 (12.5%)   | 615 (18.0%)   | 1,590 (14.9%) |
| 65+                                                                                 | 91 (13.3%)                       | 589 (12.3%)   | 190 (10.6%)   | 612 (17.9%)   | 1,482 (13.9%) |
| English preferred language, No. (%)                                                 | 544 (79.3%)                      | 4,406 (91.9%) | 1,271 (70.7%) | 3,310 (97.1%) | 9,531 (89.2%) |
| No. of chronic conditions, Mean                                                     | 2.3                              | 3.5           | 3.1           | 3.0           | 3.2           |
| Patients with chronic conditions, No. (%)                                           |                                  |               |               |               |               |
| Hypertension                                                                        | 197 (28.7%)                      | 2,284 (47.7%) | 687 (38.2%)   | 1,280 (37.5%) | 4,448 (41.6%) |
| Diabetes                                                                            | 120 (17.5%)                      | 1,131 (23.6%) | 364 (20.3%)   | 424 (12.4%)   | 2,039 (19.1%) |
| Hyperlipidemia                                                                      | 201 (29.3%)                      | 1,476 (30.8%) | 536 (29.8%)   | 1,091 (32.0%) | 3,304 (30.9%) |
| Depression                                                                          | 153 (22.3%)                      | 2,075 (43.3%) | 849 (47.2%)   | 1,388 (40.7%) | 4,465 (41.8%) |
| Arthritis                                                                           | 97 (14.1%)                       | 1,201 (25.1%) | 447 (24.9%)   | 892 (26.2%)   | 2,637 (24.7%) |
| Anemia                                                                              | 132 (19.2%)                      | 1,962 (40.9%) | 522 (29.0%)   | 669 (19.6%)   | 3,285 (30.7%) |
| Chronic kidney disease                                                              | 84 (12.2%)                       | 1,054 (22.0%) | 324 (18.0%)   | 516 (15.1%)   | 1,978 (18.5%) |
| Cataracts                                                                           | 135 (19.7%)                      | 1,074 (22.4%) | 349 (19.4%)   | 576 (16.9%)   | 2,134 (20.0%) |
| Care utilization at BMC from 1/1/2021 through 11/24/2021, No. (Per patient average) |                                  |               |               |               |               |

|                                   |              |                |                |                |                 |
|-----------------------------------|--------------|----------------|----------------|----------------|-----------------|
| Primary care visits               | 1,524 (2.22) | 15,040 (3.14)  | 5,808 (3.23)   | 8,008 (2.35)   | 30,380 (2.84)   |
| Non-primary care visits           | 6,127 (8.93) | 56,234 (11.73) | 21,893 (12.18) | 37,269 (10.93) | 121,523 (11.37) |
| Emergency department visits       | 107 (0.16)   | 2,548 (0.53)   | 903 (0.50)     | 726 (0.21)     | 4,284 (0.40)    |
| Inpatient admissions              | 46 (0.07)    | 613 (0.13)     | 199 (0.11)     | 321 (0.09)     | 1,179 (0.11)    |
| Zip code income quintile, No. (%) |              |                |                |                |                 |
| Highest income quintile           | 347 (50.6%)  | 1,671 (34.9%)  | 642 (35.7%)    | 2,067 (60.6%)  | 4,727 (44.2%)   |
| 2nd income quintile               | 215 (31.3%)  | 829 (17.3%)    | 484 (26.9%)    | 818 (24.0%)    | 2,346 (22.0%)   |
| 3rd income quintile               | 88 (12.8%)   | 1,275 (26.6%)  | 313 (17.4%)    | 299 (8.8%)     | 1,975 (18.5%)   |
| 4th income quintile               | 12 (1.7%)    | 183 (3.8%)     | 109 (6.1%)     | 97 (2.8%)      | 401 (3.8%)      |
| Lowest income quintile            | 20 (2.9%)    | 821 (17.1%)    | 244 (13.6%)    | 97 (2.8%)      | 1,182 (11.1%)   |

**Notes:** Table shows characteristics for patients who were primary care active at BMC in 2020 (at least 1 primary care outpatient visit in 2020) and had sent at least one patient medical advice request message in 2021. Patient race and ethnicity groups were determined based on patient self-reported data recorded in BMC’s electronic health record. All patients of Hispanic or Latino ethnicity were grouped together into the “Hispanic” group, regardless of race. The remaining non-Hispanic patients were categorized by race. Patients with a recorded race of “Native Hawaiian or Other Pacific Islander”, “American Indian or Alaska Native”, or “Other” were excluded due to insufficient sample size. Patients with unknown race and ethnicity were excluded as well. Patient age, zip code of residence, and health status reflected their latest record as of 11/24/21 (end of our study period). Patients’ health status was represented through binary indicators for 27 common conditions (full list provided in eTable 1). These indicators were populated based on patients’ EHR records, including their outpatient encounter diagnoses, diagnoses on their “problem list”, and primary diagnoses from their inpatient encounters. “Zip code income quintiles” are based on data from the 2022 American Community Survey and represent the median household income for patients’ zip code of residence. 0.5% of patients had missing zip code of residence data and were not included in the zip code income quintile measures.

**eTable 3. Additional 2021 Patient Medical Advice Request Care Team Response Outcomes for Patients Who Were Primary Care Active at Boston Medical Center in 2020**

|                                                                                                     | Patient race and ethnicity group |                |               |                |                |
|-----------------------------------------------------------------------------------------------------|----------------------------------|----------------|---------------|----------------|----------------|
|                                                                                                     | Asian                            | Black          | Hispanic      | White          | Total          |
| Total PCP active patients, No. (% of total)                                                         | 2,006 (5.1%)                     | 21,600 (55.3%) | 7,185 (18.4%) | 8,252 (21.1%)  | 39,043 (100%)  |
| Patient medical advice request threads, No. (% of total)                                            | 2,714 (4.7%)                     | 23,174 (40.2%) | 8,804 (15.3%) | 23,012 (39.9%) | 57,704 (100%)  |
| Patient medical advice request threads - first response, No. (% of threads sent by group)           |                                  |                |               |                |                |
| Attending physician                                                                                 | 539 (19.9%)                      | 3,164 (13.7%)  | 1,335 (15.2%) | 4,440 (19.3%)  | 9,478 (16.4%)  |
| Registered nurse                                                                                    | 838 (30.9%)                      | 7,603 (32.8%)  | 2,738 (31.1%) | 6,068 (26.4%)  | 17,247 (29.9%) |
| Advanced practice provider                                                                          | 128 (4.7%)                       | 1,445 (6.2%)   | 578 (6.6%)    | 1,477 (6.4%)   | 3,628 (6.3%)   |
| Resident                                                                                            | 124 (4.6%)                       | 528 (2.3%)     | 203 (2.3%)    | 483 (2.1%)     | 1,338 (2.3%)   |
| Other                                                                                               | 294 (10.8%)                      | 2,632 (11.4%)  | 1,010 (11.5%) | 2,308 (10.0%)  | 6,244 (10.8%)  |
| Number of care team responses to patient medical advice request threads, No. (Mean per thread)      | 2,884 (1.06)                     | 22,710 (0.98)  | 8,520 (0.97)  | 22,206 (0.96)  | 56,320 (0.98)  |
| Patient medical advice request threads hours to first response, Median                              | 15.4                             | 13.3           | 12.8          | 13.6           | 13.5           |
| Patient medical advice threads with final message sent by patient, No. (% of threads sent by group) | 1,174 (43.3%)                    | 11,371 (49.1%) | 4,171 (47.4%) | 11,766 (51.1%) | 28,482 (49.4%) |

**Notes:** Table shows additional response outcomes for medical advice requests sent from 1/1/2021 through 11/24/2021 by Asian, Black, Hispanic, or White patients who were primary care active at BMC in 2020 and is aimed to complement the primary outcomes examined in Table 2 in the main text. Medical advice request threads include a patient-initiated initial message and all other messages in the response chain.

**eTable 4. Characteristics of 2021 Patient Medical Advice Request Threads From Patients Who Were Primary Care Active at Boston Medical Center in 2020**

|                                                                                     | Patient race and ethnicity group |                |               |                |                |
|-------------------------------------------------------------------------------------|----------------------------------|----------------|---------------|----------------|----------------|
|                                                                                     | Asian                            | Black          | Hispanic      | White          | Total          |
| Patient medical advice request threads, No.                                         | 2,714                            | 23,174         | 8,804         | 23,012         | 57,704         |
| Patient medical advice request thread characteristics, No. (% of threads)           |                                  |                |               |                |                |
| Initial message has attachment                                                      | 283 (10.4%)                      | 2,141 (9.2%)   | 918 (10.4%)   | 1,972 (8.6%)   | 5,314 (9.2%)   |
| Initial message sent outside working hours                                          | 927 (34.2%)                      | 7,521 (32.5%)  | 2,903 (33.0%) | 7,307 (31.8%)  | 18,658 (32.3%) |
| Initial message sent via mobile app                                                 | 1,213 (44.7%)                    | 14,171 (61.2%) | 6,049 (68.7%) | 10,333 (44.9%) | 31,766 (55.0%) |
| Initial message sent via Android mobile app                                         | 246 (9.1%)                       | 5,057 (21.8%)  | 1,774 (20.1%) | 3,810 (16.6%)  | 10,887 (18.9%) |
| Initial message sent via iPhone mobile app                                          | 967 (35.6%)                      | 9,114 (39.3%)  | 4,275 (48.6%) | 6,523 (28.3%)  | 20,879 (36.2%) |
| Portal function was accessed in same session as initial message, No. (% of threads) |                                  |                |               |                |                |
| Medical Histories                                                                   | 924 (34.0%)                      | 8,603 (37.1%)  | 3,626 (41.2%) | 7,398 (32.1%)  | 20,551 (35.6%) |
| Test Results Details                                                                | 317 (11.7%)                      | 3,176 (13.7%)  | 1,228 (13.9%) | 2,453 (10.7%)  | 7,174 (12.4%)  |
| Upcoming Appointment Details                                                        | 281 (10.4%)                      | 3,034 (13.1%)  | 1,222 (13.9%) | 2,762 (12.0%)  | 7,299 (12.6%)  |
| Medications                                                                         | 344 (12.7%)                      | 3,154 (13.6%)  | 1,219 (13.8%) | 3,566 (15.5%)  | 8,283 (14.4%)  |
| View Clinical Notes                                                                 | 152 (5.6%)                       | 1,427 (6.2%)   | 588 (6.7%)    | 1,343 (5.8%)   | 3,510 (6.1%)   |
| Number of patient advice request messages, No. (Mean per thread)                    | 4,085 (1.51)                     | 34,519 (1.49)  | 12,688 (1.44) | 34,381 (1.49)  | 85,673 (1.48)  |

**Notes:** Table shows characteristics of medical advice requests sent from 1/1/2021 through 11/24/2021 by Asian, Black, Hispanic, or White patients who were primary care active at BMC in 2020. Medical advice request threads include a patient-initiated initial message and all other messages in the response chain; however, all characteristics shown here focus on the initial message in the thread, with the exception to the last row. Each thread was linked to the portal session in which the initial message was sent. For each portal session we observed whether the session was conducted via Epic’s MyChart mobile app or through a web browser, and which type of mobile device was used to access the mobile app (Android or iPhone). Additionally, we observed which portal functionalities were accessed during the portal sessions (e.g., Messaging, Medications, Clinical Notes, etc.).



**eFigure 1. Subgroup Sensitivity Analysis – 2021 Attending Response Rates for Patient Medical Advice Request Threads by Patients Who Were Primary Care Active at Boston Medical Center in 2020**

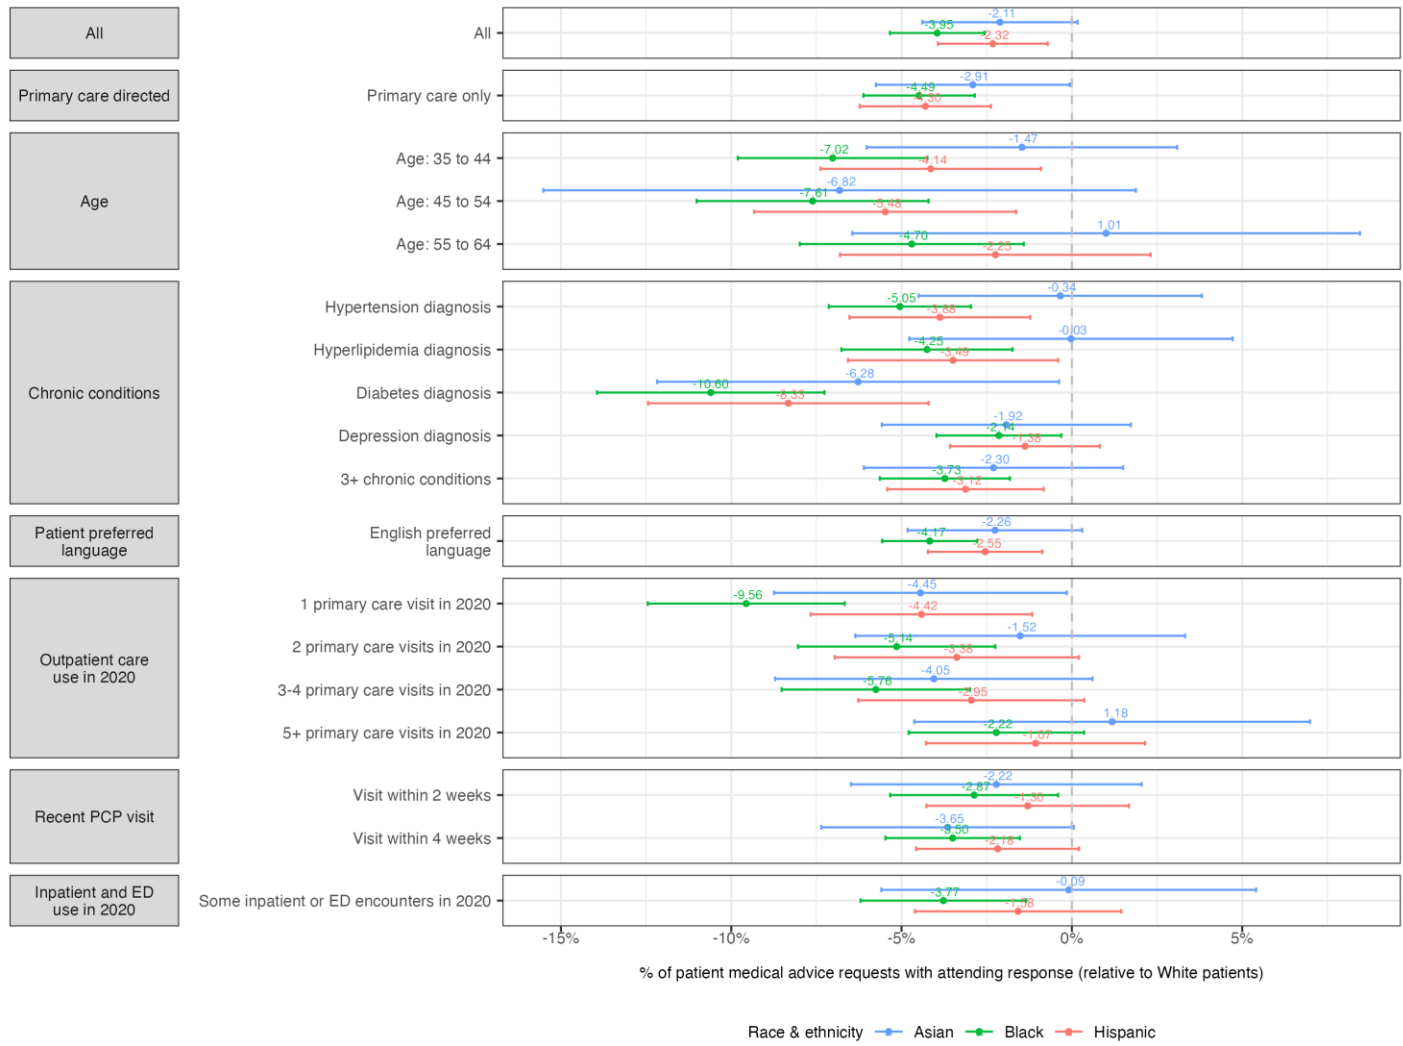

**Notes:** Each row displays the regression coefficients for a specific patient subgroup, with the exception of the “Primary care only” row which corresponds to message threads sent to primary care departments. Analysis was limited to patient-initiated medical advice requests sent from 1/1/2021 through 11/24/2021 by Asian, Black, Hispanic, or White patients that were primary care active in 2020 (at least 1 primary care outpatient visit in 2020). Results were adjusted for patient characteristics including sex, age, number of chronic conditions, and whether English was their preferred language. Results were also adjusted for the date and time the message was initially sent. Fixed effects were included for the patient’s health insurer, zip code of residence, most seen primary care provider in 2020, and the recipient department. Error bars reflect 95% confidence intervals with heteroskedasticity robust standard errors clustered at the patient level.

**eFigure 2. Alternative Sample Sensitivity Analysis – 2021 Care Team Response Rates for Patient Medical Advice Request Threads by Patients Who Were Primary Care Active at Boston Medical Center in 2019**

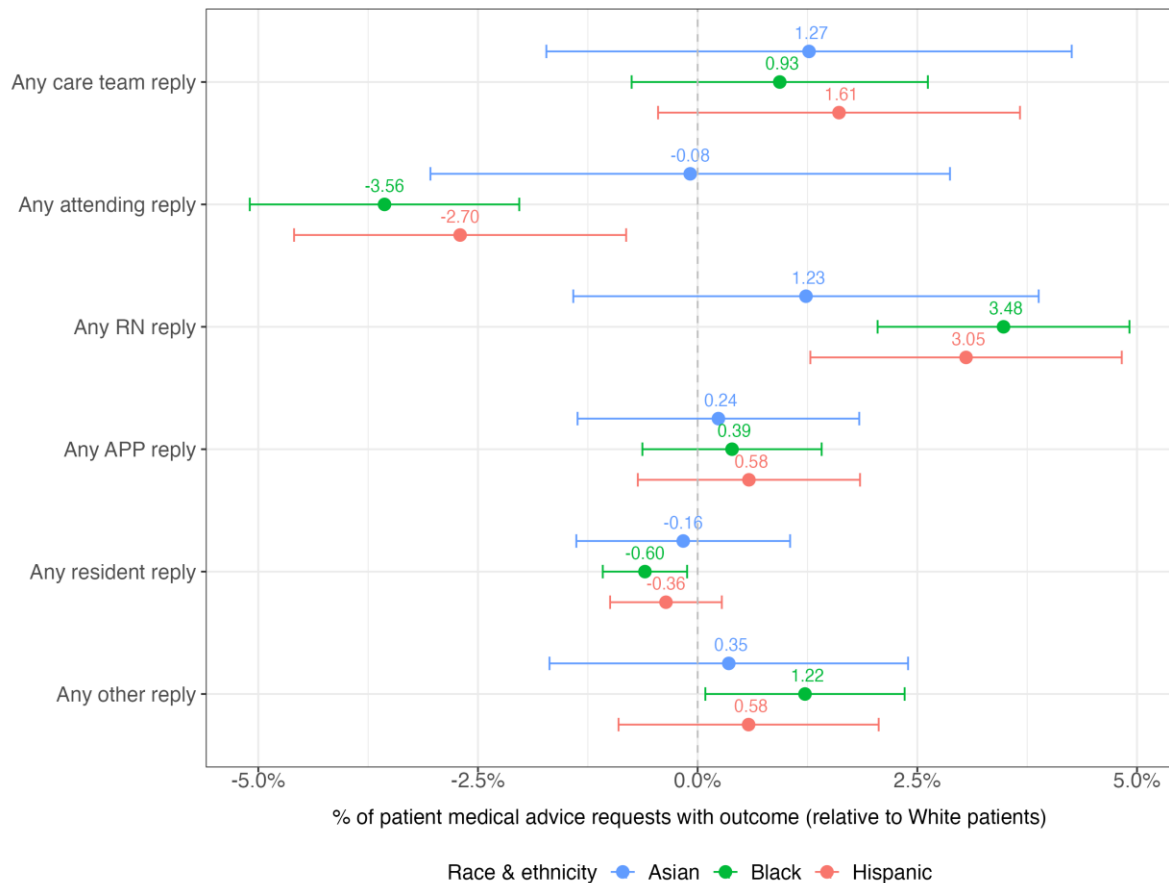

**Notes:** These estimates show robustness of our findings to an alternative sample definition examining 2021 medical advice requests from patients that were primary care active in 2019, rather than 2020. This alternative approach avoids overlap between our patient sample qualification period and early disruptions from the pandemic. Similar to our main specification, results were adjusted for patient characteristics including sex, age, number of chronic conditions, and whether English was their preferred language. Results were also adjusted for the year-month, the day of the week, and the hour of the day the message was initially sent. Fixed effects were included for the patient’s health insurer, zip code of residence, most seen primary care provider in 2019, and the recipient department. Error bars reflect 95% confidence intervals with heteroskedasticity robust standard errors clustered at the patient level.

**eFigure 3. Random Effects Model Sensitivity Analysis – 2021 Care Team Response Rates for Patient Medical Advice Request Threads by Patients Who Were Primary Care Active at Boston Medical Center in 2020**

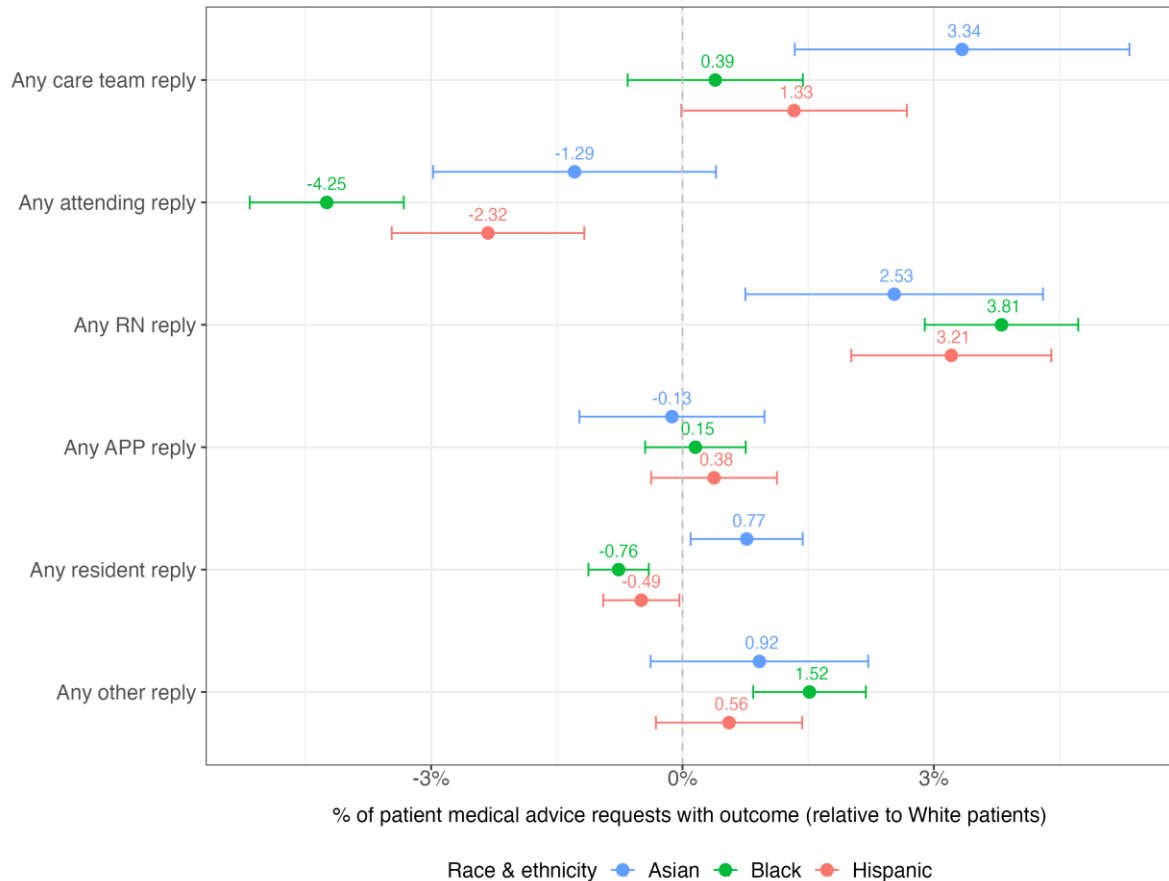

**Notes:** These estimates show robustness of our findings to an alternative regression specification that uses random, rather than fixed effects, to adjust for the threads' recipient department and patients' health insurer, zip code of residence, and most seen primary care provider in 2020. Analysis was limited to patient-initiated medical advice requests sent from 1/1/2021 through 11/24/2021 by Asian, Black, Hispanic, or White patients that were primary care active in 2020 (at least 1 primary care outpatient visit in 2020). Similar to our main specification, results were adjusted for patient characteristics including sex, age, number of chronic conditions, and whether English was their preferred language. Results were also adjusted for the year-month, the day of the week, and the hour of the day the message was initially sent. Error bars reflect 95% confidence intervals.

**eFigure 4. 2021 First Care Team Response to Patient Medical Advice Request Threads by Patients Who Were Primary Care Active at Boston Medical Center in 2020**

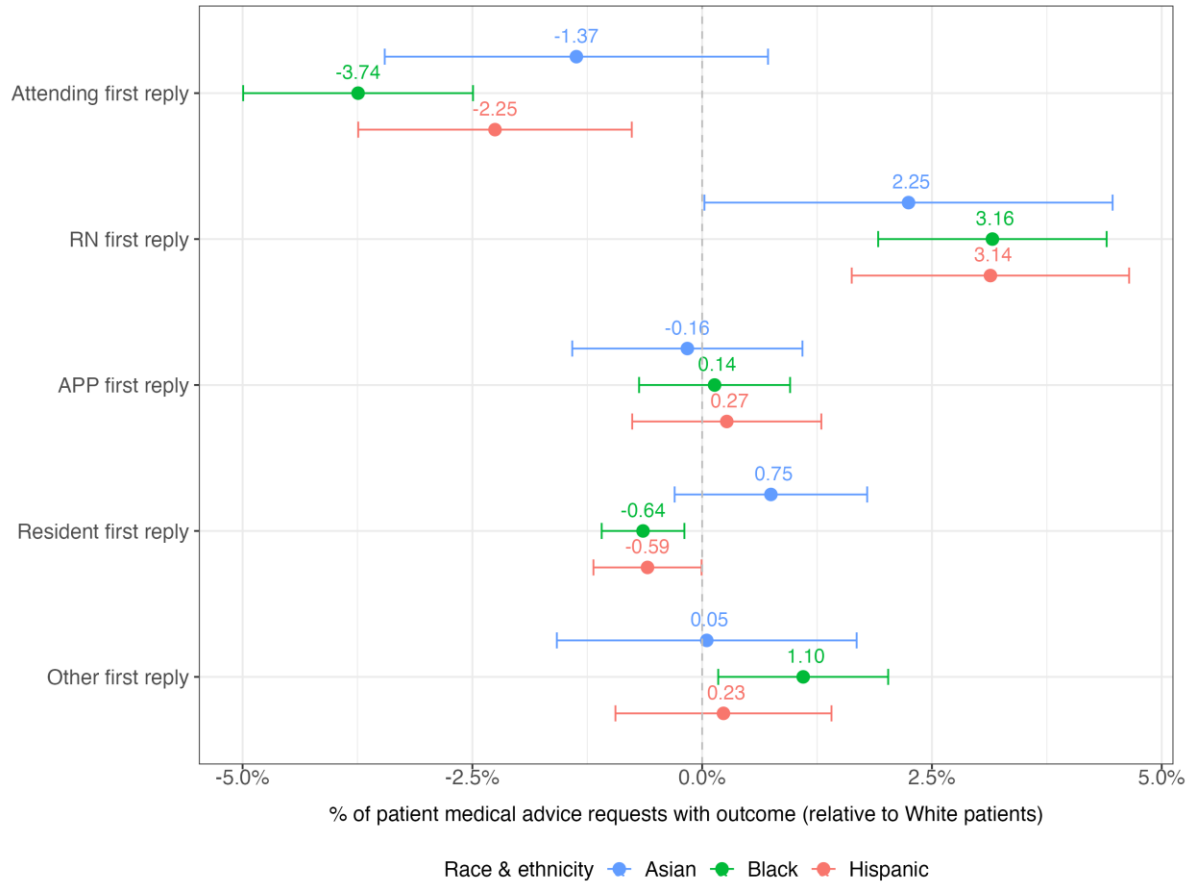

**Notes:** This figure shows results for a secondary set of care response outcomes that capture the provider type that gave the thread’s first care team response (rather than examining whether that provider type provided any response over the course of the thread). Analysis was limited to patient-initiated medical advice requests sent from 1/1/2021 through 11/24/2021 by Asian, Black, Hispanic, or White patients that were primary care active in 2020 (at least 1 primary care outpatient visit in 2020). Results were adjusted for patient characteristics including sex, age, number of chronic conditions, and whether English was their preferred language. Results were also adjusted for the year-month, the day of the week, and the hour of the day the message was initially sent. Fixed effects were included for the patient’s health insurer, zip code of residence, most seen primary care provider in 2020, and the recipient department. Error bars reflect 95% confidence intervals with heteroskedasticity robust standard errors clustered at the patient level

**eTable 5. Additional 2021 Care Team Response Outcomes to Patient Medical Advice Request Threads by Patients Who Were Primary Care Active at Boston Medical Center in 2020 – Comparison by Patient Race and Ethnicity, Controlling for Patient Characteristics, Message Characteristics, and Recipient Department**

| <b>Outcome</b>                                        | <b>Coefficient (95% CI)</b> | <b>P value</b> |
|-------------------------------------------------------|-----------------------------|----------------|
| Number of care team responses                         |                             |                |
| Asian                                                 | -0.011 (-0.072 to 0.051)    | 0.734          |
| Black                                                 | -0.03 (-0.061 to 0.001)     | 0.056          |
| Hispanic                                              | -0.055 (-0.093 to -0.016)   | 0.006          |
| Hours to first reply                                  |                             |                |
| Asian                                                 | 3.87 (-1.18 to 8.93)        | 0.133          |
| Black                                                 | -1.79 (-4.78 to 1.21)       | 0.242          |
| Hispanic                                              | 0.04 (-3.58 to 3.65)        | 0.984          |
| Percent of threads with final message sent by patient |                             |                |
| Asian                                                 | -0.035 (-0.063 to -0.007)   | 0.015          |
| Black                                                 | -0.011 (-0.03 to 0.008)     | 0.248          |
| Hispanic                                              | -0.021 (-0.042 to -0.001)   | 0.045          |

**Notes:** This table shows regression coefficients for additional secondary response outcomes. Analysis was limited to patient-initiated medical advice requests sent from 1/1/2021 through 11/24/2021 by Asian, Black, Hispanic, or White patients that were primary care active in 2020 (at least 1 primary care outpatient visit in 2020). Results were adjusted for patient characteristics including sex, age, number of chronic conditions, and whether English was their preferred language. Results were also adjusted for the year-month, the day of the week, and the hour of the day the message was initially sent. Fixed effects were included for the patient’s health insurer, zip code of residence, most seen primary care provider in 2020, and the recipient department. Error bars reflect 95% confidence intervals with heteroskedasticity robust standard errors clustered at the patient level

**eTable 6. Share of 2021 Patient Medical Advice Request Threads From Patients Who Were Primary Care Active at Boston Medical Center in 2020**

|                                                                                  | Patient race and ethnicity group |                |               |                |               |
|----------------------------------------------------------------------------------|----------------------------------|----------------|---------------|----------------|---------------|
|                                                                                  | Asian                            | Black          | Hispanic      | White          | Total         |
| Total PCP active patients, No. (% of total)                                      | 2,006 (5.1%)                     | 21,600 (55.3%) | 7,185 (18.4%) | 8,252 (21.1%)  | 39,043 (100%) |
| Patient medical advice request threads, No. (% of total)                         | 2,714 (4.7%)                     | 23,174 (40.2%) | 8,804 (15.3%) | 23,012 (39.9%) | 57,704 (100%) |
| Patient medical advice request threads with care team response, No. (% of total) |                                  |                |               |                |               |
| Any care team response                                                           | 1,923 (5.1%)                     | 15,372 (40.5%) | 5,864 (15.5%) | 14,776 (39.0%) | 37,935 (100%) |
| Any attending physician response                                                 | 601 (5.3%)                       | 3,861 (34.2%)  | 1,592 (14.1%) | 5,220 (46.3%)  | 11,274 (100%) |
| Any registered nurse response                                                    | 872 (4.9%)                       | 7,897 (44.0%)  | 2,832 (15.8%) | 6,335 (35.3%)  | 17,936 (100%) |
| Any advance practice provider response                                           | 150 (3.6%)                       | 1,657 (40.2%)  | 667 (16.2%)   | 1,646 (40.0%)  | 4,120 (100%)  |
| Any resident response                                                            | 131 (8.8%)                       | 572 (38.2%)    | 241 (16.1%)   | 553 (36.9%)    | 1,497 (100%)  |
| Any other response                                                               | 338 (4.9%)                       | 2,901 (41.9%)  | 1,110 (16.0%) | 2,576 (37.2%)  | 6,925 (100%)  |

**Notes:** This table examines the share of medical advice threads with various response outcomes accounted for by each patient race and ethnicity group (e.g., White patients accounted for 46.3% of all medical advice threads that received an attending physician response). Analysis was limited to patient-initiated medical advice requests sent from 1/1/2021 through 11/24/2021 by Asian, Black, Hispanic, or White patients that were primary care active in 2020 (at least 1 primary care outpatient visit in 2020).
