# Supplementary material for: Differences in Care Team Response to Patient Portal Messages by Patient Race and Ethnicity
Source: PubMed Central journal article supplement (PMC10949096; doi:10.1001/jamanetworkopen.2024.2618), 2024-03-18
Supplement: jamanetwopen-e242618-s002.pdf [file jamanetwopen-e242618-s002.pdf]

## Data Sharing Statement

Tang. Differences in Care Team Response to Patient Portal Messages by Patient Race and Ethnicity. *JAMA Netw Open*. Published March 18, 2024.

doi:10.1001/jamanetworkopen.2024.2618

### Data

**Data available:** No

### Additional Information

**Explanation for why data not available:** These data are highly confidential and require access via Boston Medical Center. We are happy to make analysis code available to any interested researchers.
